# Supplementary material for: Comparative studies on the aggregate formation of synthesized zwitterionic gemini and monomeric surfactants in the presence of the amphiphilic antipsychotic drug chlorpromazine hydrochloride in aqueous solution: an experimental and theoretical approach
Source: Royal Society of Chemistry journal article supplement (doi:10.1039/d3sm00907f), 2023-01-01
Supplement: d3sm00907f1.pdf [file d3sm00907f1.pdf]

## Supporting Information

### Comparative Studies on the aggregate formation of synthesized zwitterionic gemini and monomeric surfactants in the presence of amphiphilic antipsychotic drug chlorpromazine hydrochloride in aqueous solution: an experimental and theoretical approach

Rajesh Banik<sup>1</sup>, Sourav Das<sup>1</sup>, Asitanga Ghosh<sup>2</sup> and Soumen Ghosh<sup>1\*</sup>

<sup>1</sup> Centre for Surface Science, Physical Chemistry Section, Department of Chemistry, Jadavpur University, Kolkata-700032, West Bengal, India

<sup>2</sup> Department of Chemistry, Hooghly Mohsin College, P. O. – Chinsurah, Hooghly, 712101, West Bengal, India

\*Mail id of correspondence author: [gsoumen70@hotmail.com](mailto:gsoumen70@hotmail.com)

#### Table of Contents

|                                                                                                                                  |          |
|----------------------------------------------------------------------------------------------------------------------------------|----------|
| Synthesis of zwitterionic surfactant: N-Dodecyl-N,N'-dimethyl-2-ammonio-1-ethanecarbonate (1)                                    | Page S2  |
| Synthesis and characterization of zwitterionic gemini surfactant 1,2-Bis[N-methyl-N-carboxymethyltetradecylammonium] ethane (2): | Page S3  |
| FT-IR spectrum of zwitterionic surfactant: N-Dodecyl-N,N-dimethyl-2-ammonio-1-ethanecarbonate (1)                                | Page S6  |
| <sup>1</sup> H-NMR spectrum of zwitterionic surfactant: N-Dodecyl-N,N-dimethyl-2-ammonio-1-ethanecarbonate (1)                   | Page S7  |
| <sup>13</sup> C-NMR spectrum of zwitterionic surfactant: N-Dodecyl-N,N-dimethyl-2-ammonio-1-ethanecarbonate (1)                  | Page S8  |
| FT-IR spectrum of N, N'-dimethyl-N, N'-bis-(tetradecyl)-ethylenediamine (5)                                                      | Page S9  |
| <sup>1</sup> H-NMR spectrum of N, N'-dimethyl-N, N'-bis-(tetradecyl)-ethylenediamine (5)                                         | Page S10 |

|                                                                                                |          |
|------------------------------------------------------------------------------------------------|----------|
| FT-IR spectrum of 1,2-bis[N-methyl-N-carboxymethyltetradecylammonium] ethane (2)               | Page S11 |
| <sup>1</sup> H-NMR spectrum of 1,2-bis[N-methyl-N-carboxymethyltetradecylammonium] ethane (2)  | Page S12 |
| <sup>13</sup> C-NMR spectrum of 1,2-bis[N-methyl-N-carboxymethyltetradecylammonium] ethane (2) | Page S13 |
| Detailed calculation of Packing Parameter                                                      | Page S14 |
| Dynamic light scattering (DLS) size distribution plots of CPZ/C <sub>12</sub> DmCB system      | Page S15 |
| Dynamic light scattering (DLS) size distribution plots of CPZ/C <sub>14</sub> Ab system        | Page S17 |

### Synthesis and characterization of zwitterionic surfactant: N-Dodecyl-N,N'-dimethyl-2-ammonio-1-ethanecarbonate (1)

8.52 g (0.04 mole, 1 equiv.) of N, N'-Dimethyldodecylamine (**3**) was mixed with 5.1 g (0.044 mole, 1.1 equiv.) of sodium chloroacetate (**4**) in 50 mL methanol/water mixture (1:3, v/v) and was refluxed for overnight at 78-80°C. The solvent was removed in *vacuo* and the residue was dissolved in dry acetone and filtered to remove unreacted **4** and salt so formed. The filtrate was collected and the acetone was removed in *vacuo* to get the desired product **1** as a highly viscous and colourless liquid (Scheme 1).

Yield: (10.04 g, 93%). IR: 3417 (broad peak), 2919, 2851, 1620 cm<sup>-1</sup>. <sup>1</sup>H NMR (CDCl<sub>3</sub>, 400 MHz) δ (ppm): 0.90 [t, 3H, *J* 8Hz, CH<sub>3</sub>(CH<sub>2</sub>)<sub>11</sub>-], 1.27– 1.33 [m, 18H, CH<sub>3</sub>(CH<sub>2</sub>)<sub>9</sub>-CH<sub>2</sub>-CH<sub>2</sub>-], 1.70 [br s, 2H, CH<sub>3</sub>(CH<sub>2</sub>)<sub>9</sub>-CH<sub>2</sub>-CH<sub>2</sub>-N-], 3.29 (s, 6H, (CH<sub>3</sub>)<sub>2</sub>N-), 3.56-3.58 (m, 2H, CH<sub>3</sub>(CH<sub>2</sub>)<sub>10</sub>-CH<sub>2</sub>-N-), 4.36 [s, 2H, -N-CH<sub>2</sub>-COO-]. <sup>13</sup>C NMR (100 MHz) δ (ppm): 14.12, 22.72, 22.88, 26.51, 29.45, 29.74, 29.74, 29.75, 29.81, 31.97, 42.76, 51.32, 57.98, 64.06, 64.36, 167.72.

Scheme 1

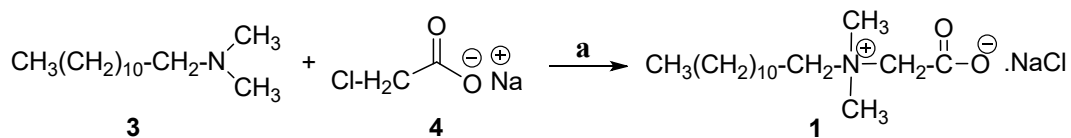

**Scheme 1. Reaction condition, a: refluxed for overnight at 78-80°C in methanol/water mixture (1:3, v/v).**

**Synthesis and characterization of zwitterionic gemini surfactant 1,2-Bis[N-methyl-N-carboxymethyltetradecylammonium] ethane (2):**

Zwitterionic gemini surfactant 2 was prepared via 2 steps (a & b) as follows:

**a. Synthesis of N, N'-dimethyl-N, N'-bis-(tetradecyl)-ethylenediamine (5)**

To a stirred solution of N, N'-Dimethylethylenediamine (**6**, 0.025 mol, 2.2 g, 1 eq.v.) in 20 mL dry ethanol, 1-bromotetradecane (**7**, 0.055 mol, 16 g, 1.1 equivalent) and 3 g NaOH were added and the resulting mixture was refluxed for overnight at 78°C. The resulting solution was filtered to remove the inorganic salt so formed. The filtrate was quenched with 10 mL conc. hydrochloric acid, yielding hydrochloride salt of N, N'-Dimethyl-N, N'-bis-(tetradecyl)-ethylenediamine (**5**) as a white solid. After washing the solid with chloroform, it was dissolved in 30 mL 10% aqueous NaOH solution at room temperature. The upper organic layer was collected and washed three times with brine. It was then dried in vacuum to get the desired product **5** as a white solid (Scheme 2).

Yield: (11.65 g, 78%). IR: 2955, 2932, 2852, 1470  $\text{cm}^{-1}$ .  $^1\text{H}$  NMR ( $\text{CDCl}_3$ , 500 MHz)  $\delta$  (ppm): 0.90 [t, 6H,  $J$  8 Hz,  $2\text{CH}_3(\text{CH}_2)_{11}$ -], 1.27- 1.33 [m, 44H,  $2\text{CH}_3(\text{CH}_2)_{11}\text{CH}_2$ -], 1.44- 1.48 [m, 4H,

2CH<sub>3</sub>(CH<sub>2</sub>)<sub>11</sub>CH<sub>2</sub>CH<sub>2</sub>N-], 2.25 [s, 6H, 2CH<sub>2</sub>NCH<sub>3</sub>], 2.31- 2.34 [t, 4H, *J* 4.5 Hz, 2CH<sub>3</sub>(CH<sub>2</sub>)<sub>11</sub>CH<sub>2</sub>CH<sub>2</sub>N] and 2.46 [s, 4H, NCH<sub>2</sub>CH<sub>2</sub>N].

Scheme 2

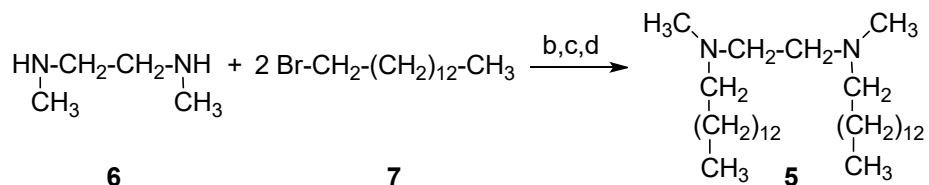

**Scheme 2. Reaction condition b: NaOH/ refluxed for overnight in dry EtOH at 78°C; c: concentrated HCl; d: 10% NaOH at room temperature.**

### b. Synthesis of 1,2-bis[N-methyl-N-carboxymethyltetradecylammonium] ethane (2)

To a stirred solution of 2-bromoacetic acid (0.05 mol, 7 g) in 50 mL methanol, NaOH (0.05 mol, 2 g) was added in batches under an ice bath. The temperature of the reaction bath was then slowly raised to 50°C and then cooled to room temperature after 30 min. Afterwards, N, N'-dimethyl-N, N'-bis-(tetradecyl)-ethylenediamine (**5**) (0.025 mol, 2 g) and 0.4 g KI were added dropwise to the reaction mixture. The mixture was refluxed for 4 days, then cooled to room temperature and filtered to remove insoluble materials. The filtrate was evaporated under reduced pressure. The residue was then dissolved in 20 mL of 2-propanol and was filtered. The filtrate after crystallization gave the desired product 1,2-bis[N-methyl-N-carboxymethyltetradecyl-ammonium] ethane (**2**) as a colourless solid (Scheme 3).

Yield: (7.55 g, 53%). IR: 3435 (broad peak), 2920, 2851, 1627 cm<sup>-1</sup>. <sup>1</sup>H NMR (CD<sub>3</sub>OD, 400 MHz): δ 0.80 [t, 6H, *J* 8 Hz, 2(CH<sub>3</sub>(CH<sub>2</sub>)<sub>13</sub>-)], 1.19–1.31 [m, 44H, 2(CH<sub>3</sub>(CH<sub>2</sub>)<sub>11</sub>-CH<sub>2</sub>-CH<sub>2</sub>-)], 1.70 [m, 4H, 2(CH<sub>3</sub>(CH<sub>2</sub>)<sub>11</sub>-CH<sub>2</sub>-CH<sub>2</sub>-N-)], 3.22 [s, 6H, 2(CH<sub>3</sub>N-)], 3.53 [m, 4H, 2(CH<sub>3</sub>(CH<sub>2</sub>)<sub>12</sub>-

CH<sub>2</sub>-N-], 3.80 [s, 4H, -NCH<sub>2</sub>CH<sub>2</sub>N-], 4.19 [s, 4H, 2(-N-CH<sub>2</sub>-COO-)]. <sup>13</sup>C NMR (100 MHz)  $\delta$  (ppm): 13.08, 20.87, 22.09, 22.34, 26.01, 28.87, 29.08, 29.21, 29.27, 29.36, 29.40, 31.67, 48.83, 53.09, 61.33, 61.49, 63.76, 167.03.

Scheme 3

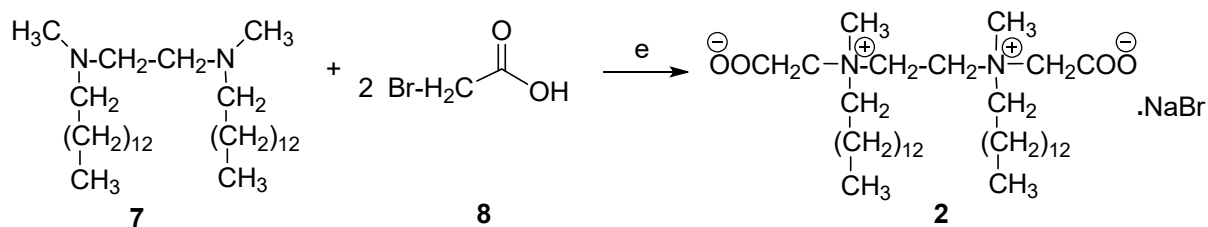

**Scheme 3. Reaction condition, e: NaOH & KI/ refluxed for 60 h in MeOH.**

# FT-IR spectrum of zwitterionic surfactant: N-Dodecyl-N,N-dimethyl-2-ammonio-1-ethanecarbonate (1)

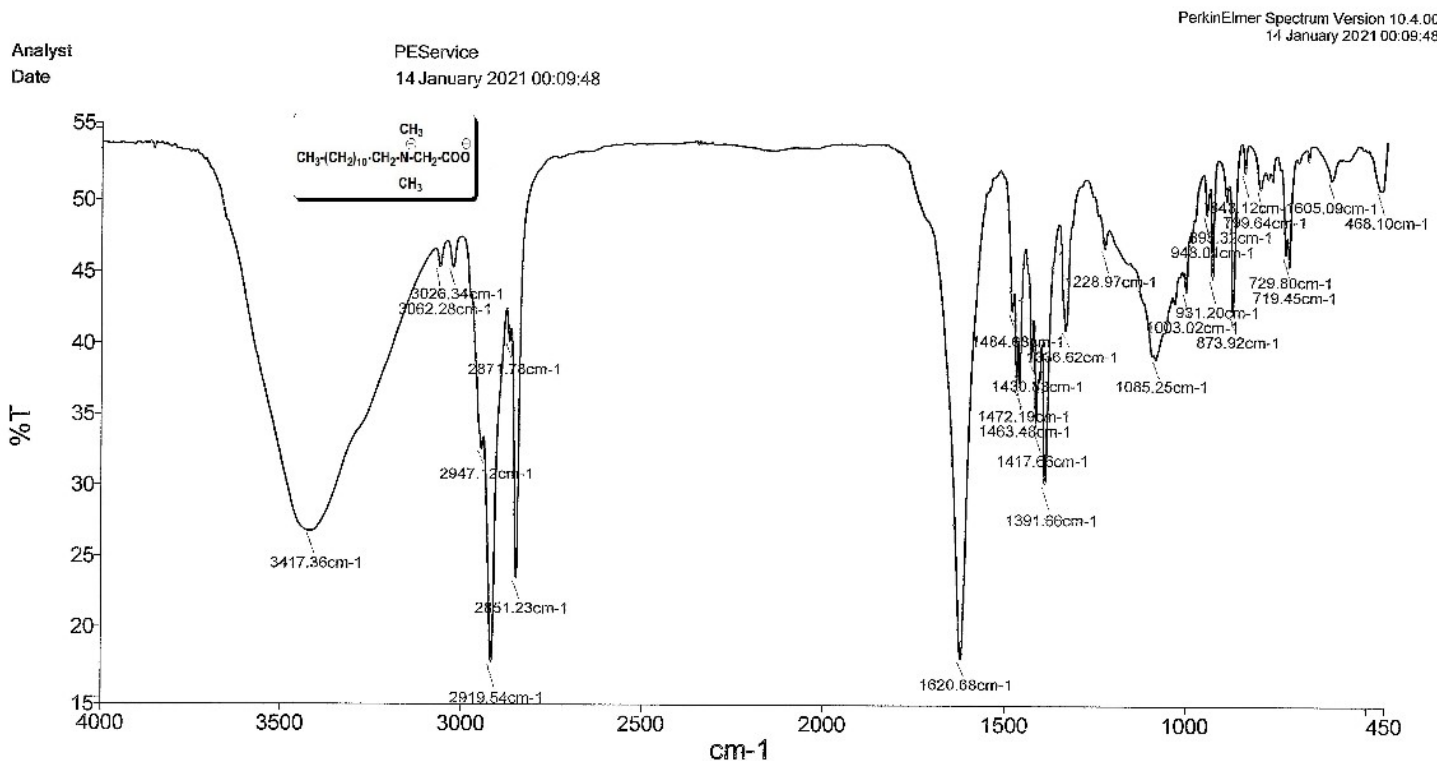

FT-IR Spectrum of N-Dodecyl-N,N-dimethyl-2-ammonio-1-ethanecarbonate

**<sup>1</sup>H-NMR spectrum of zwitterionic surfactant: N-Dodecyl-N,N-dimethyl-2-ammonio-1-ethanecarbonate (1)**

SG-ZWITTER-1-1H.10.fid - SG-ZWITTER-1-1H(SR) 400

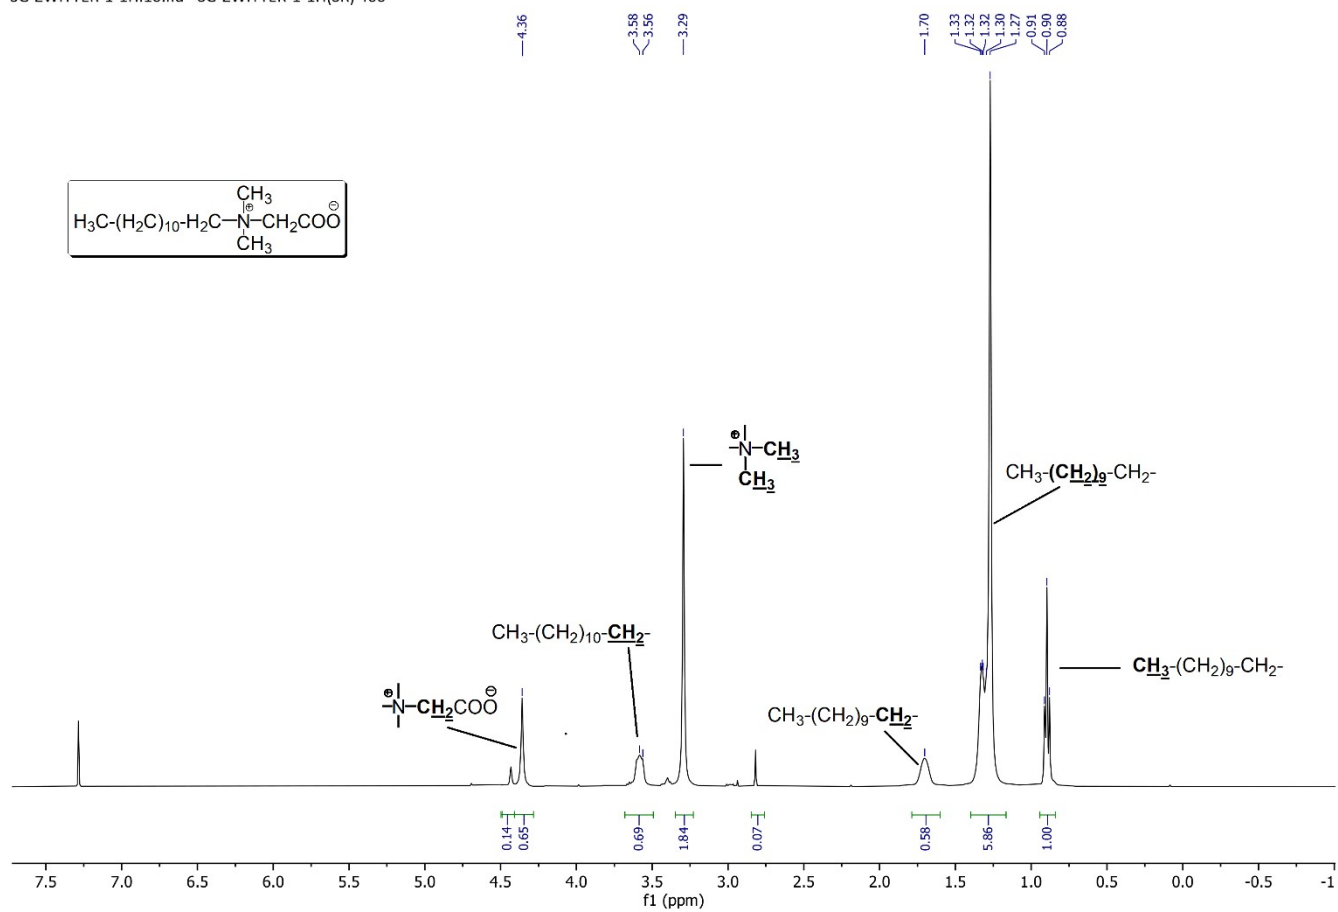

**$^{13}\text{C}$ -NMR spectrum of zwitterionic surfactant: N-Dodecyl-N,N-dimethyl-2-ammonio-1-ethanecarbonate (1)**

SG-ZWITTER-1-13C.10.fid — SG-ZWITTER-1-13C(SR) 400

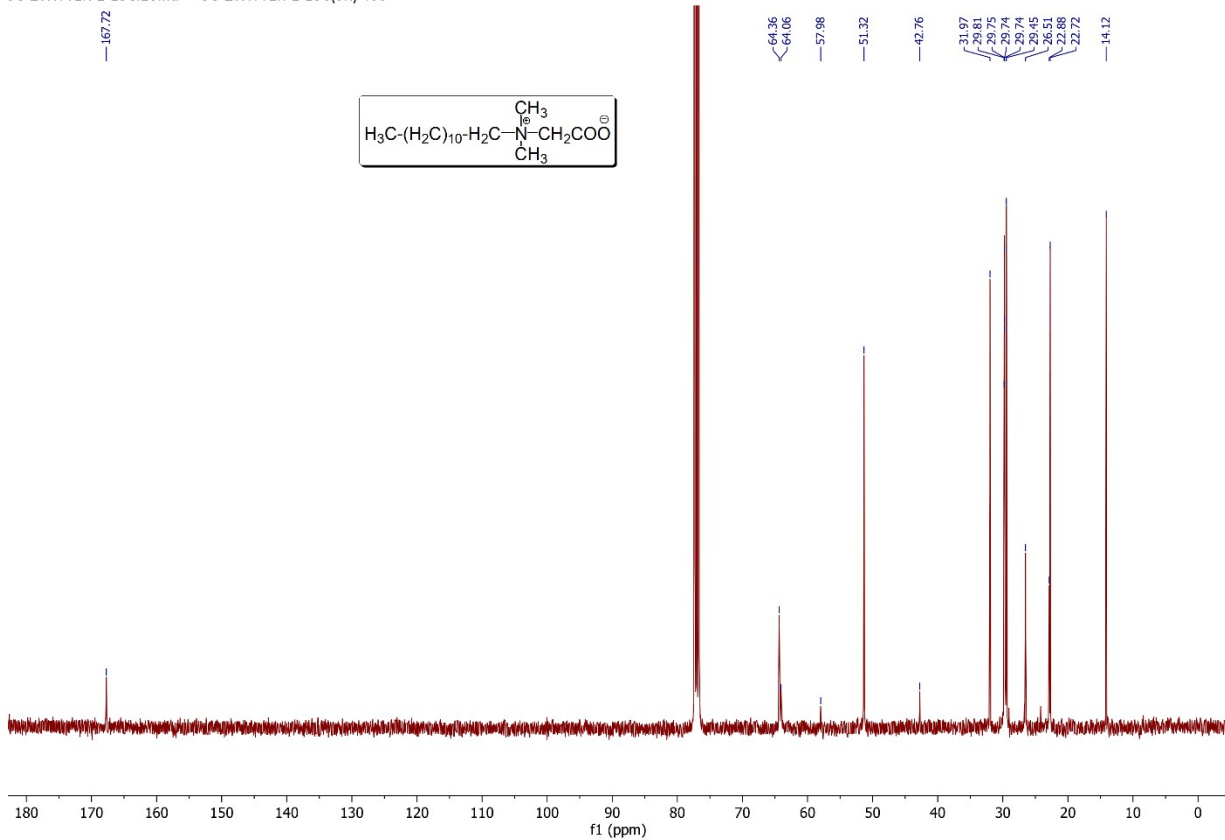



Synthesis and characterization of zwitterionic gemini surfactant 1,2-Bis[N-methyl-N-carboxymethyltetradecylammonium] ethane (2):

FT-IR spectrum of N, N'-dimethyl-N, N'-bis-(tetradecyl)-ethylenediamine (5)

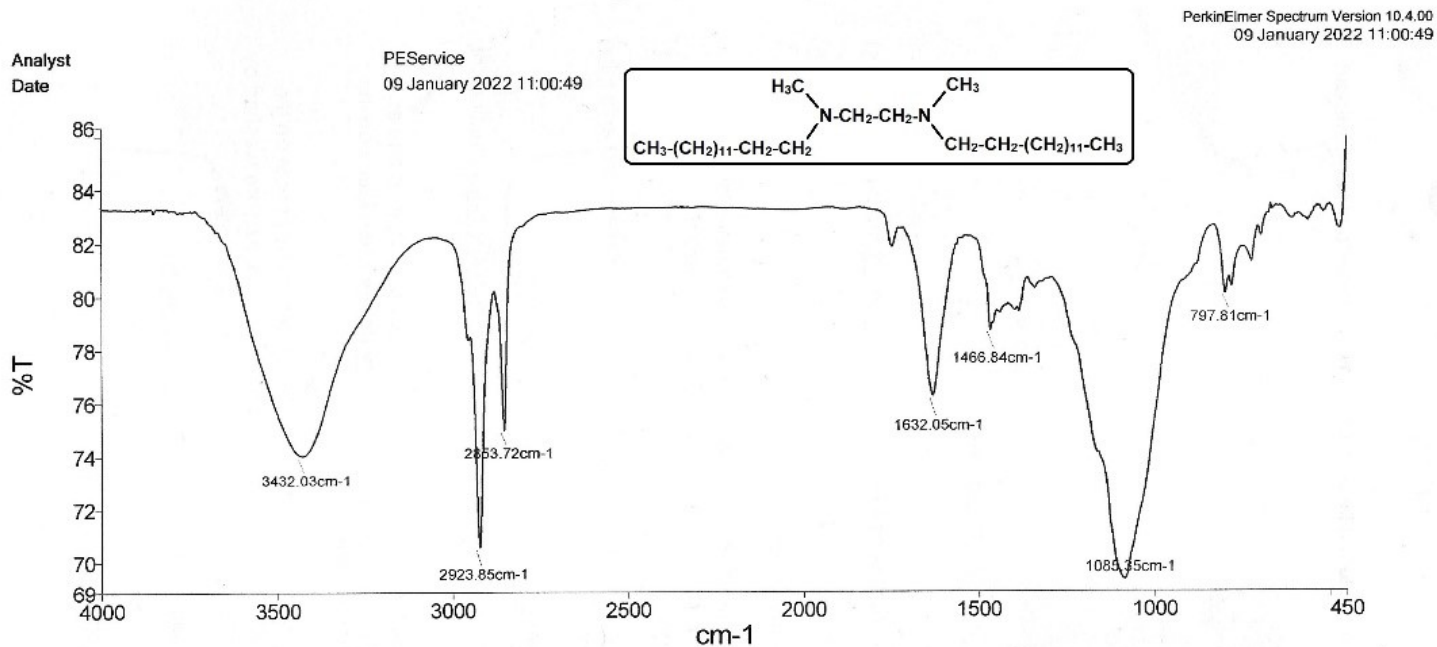

**<sup>1</sup>H-NMR spectrum of N, N'-dimethyl-N, N'-bis-(tetradecyl)-ethylenediamine (5)**

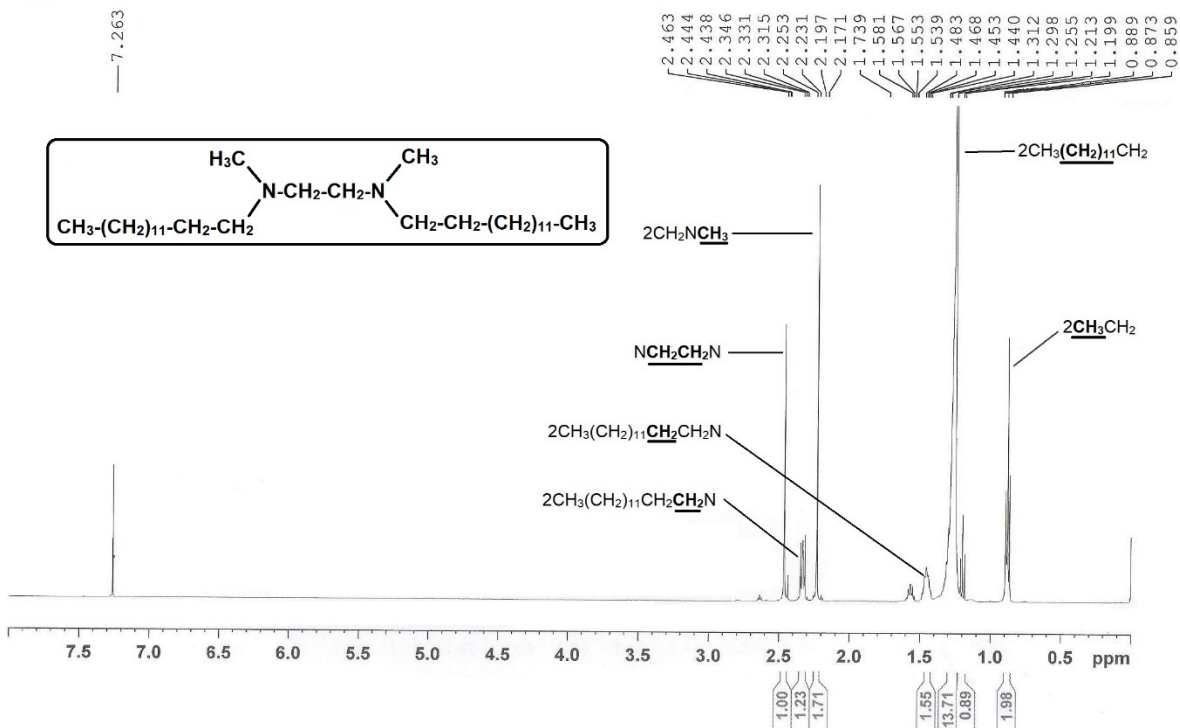

**b. Synthesis of 1,2-bis[N-methyl-N-carboxymethyltetradecylammonium] ethane (2)**

**FT-IR spectrum of 1,2-bis[N-methyl-N-carboxymethyltetradecylammonium] ethane (2)**

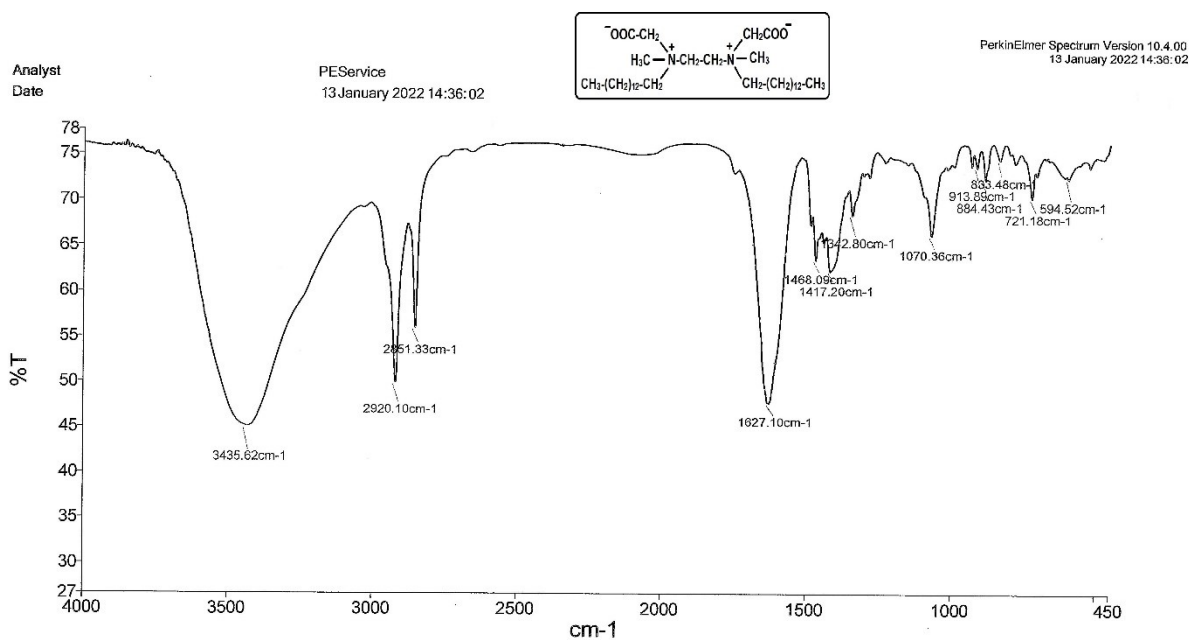

**FT-IR of N,N'-Dimethyl-N,N'-bis-(tetradecyl)-ethylenediamine**

# <sup>1</sup>H-NMR spectrum of 1,2-bis[N-methyl-N-carboxymethyltetradecylammonium] ethane (2)

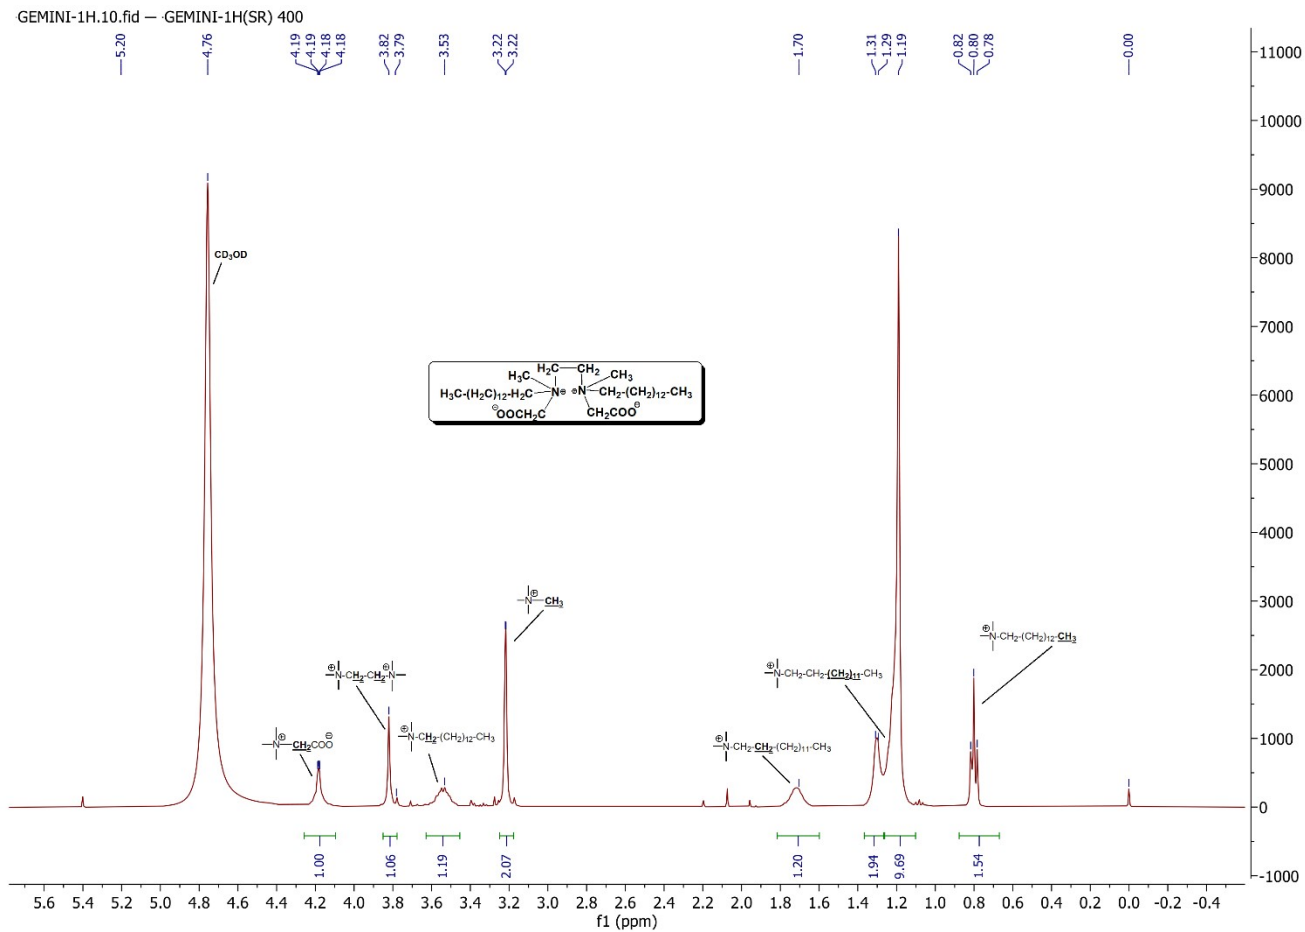

# $^{13}\text{C}$ -NMR spectrum of 1,2-bis[N-methyl-N-carboxymethyltetradecylammonium] ethane (2)

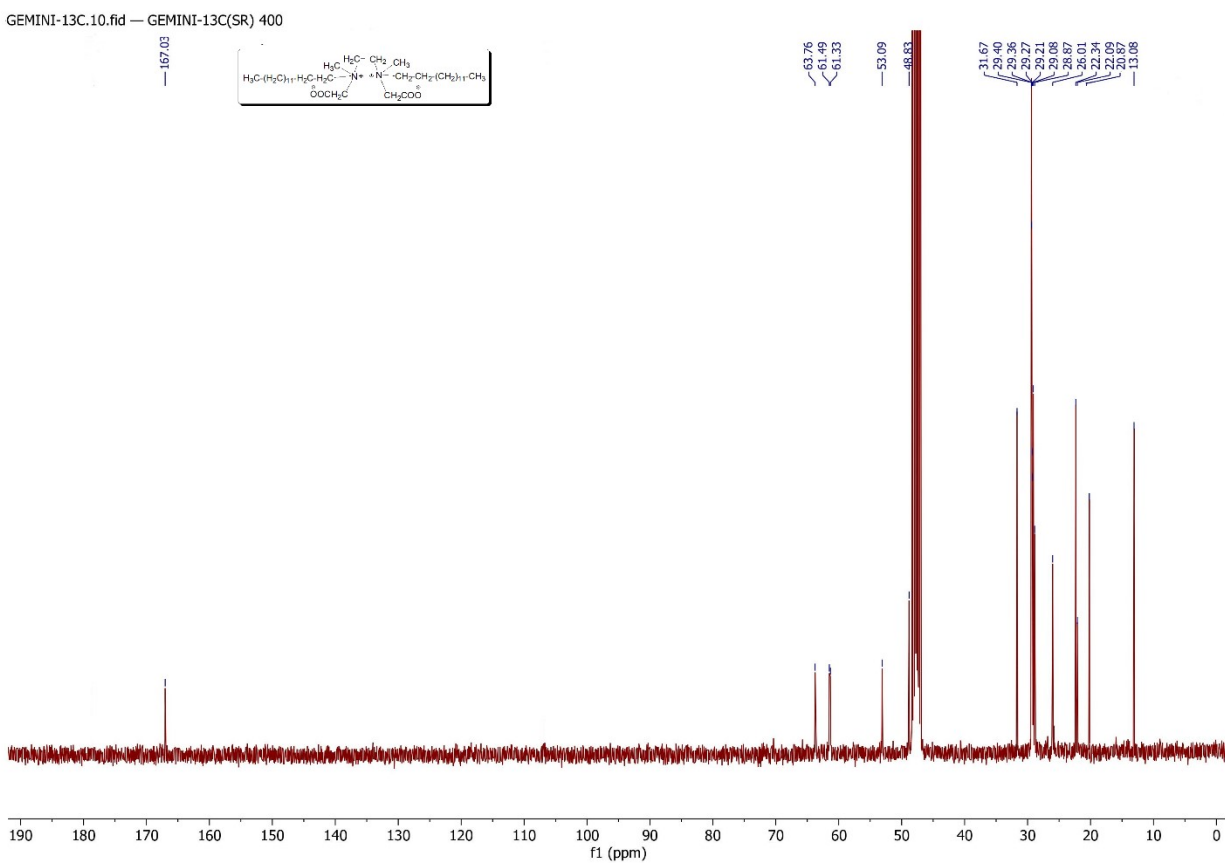

Table S1. Detailed calculation of Packing Parameter.

| $\alpha_{CPZ}$                | $l_c \leq l_{max}$ | $v$   | $A_{min}$ | $P$  |
|-------------------------------|--------------------|-------|-----------|------|
| <b>CPZ/C<sub>12</sub>DmCB</b> |                    |       |           |      |
| 0.0                           | 1.672              | 0.350 | 0.42      | 0.50 |
| 0.2                           | 1.672              | 0.377 | 0.49      | 0.45 |
| 0.4                           | 1.672              | 0.404 | 0.53      | 0.46 |
| 0.6                           | 1.672              | 0.431 | 1.03      | 0.25 |
| 0.8                           | 1.672              | 0.458 | 2.09      | 0.13 |
| 1.0                           | 1.039              | 0.485 | 2.14      | 0.21 |
| <b>CPZ/C<sub>14</sub>Ab</b>   |                    |       |           |      |
| 0.0                           | 1.925              | 0.404 | 0.23      | 0.92 |
| 0.2                           | 1.925              | 0.420 | 0.33      | 0.66 |
| 0.4                           | 1.925              | 0.436 | 0.47      | 0.48 |
| 0.6                           | 1.925              | 0.452 | 0.46      | 0.51 |
| 0.8                           | 1.925              | 0.468 | 0.58      | 0.42 |
| 1.0                           | 1.039              | 0.484 | 2.14      | 0.21 |

**Dynamic light scattering (DLS) size distribution plots of CPZ/C<sub>12</sub>DmCB system**

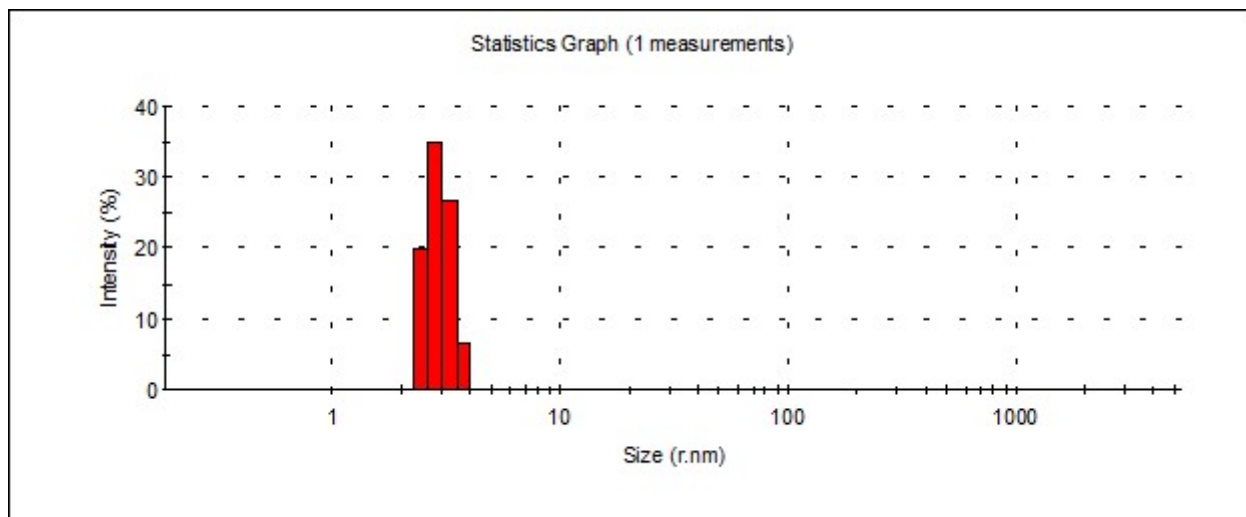

$$\alpha_{CPZ} = 0$$

$$\alpha_{CPZ} = 0.2$$

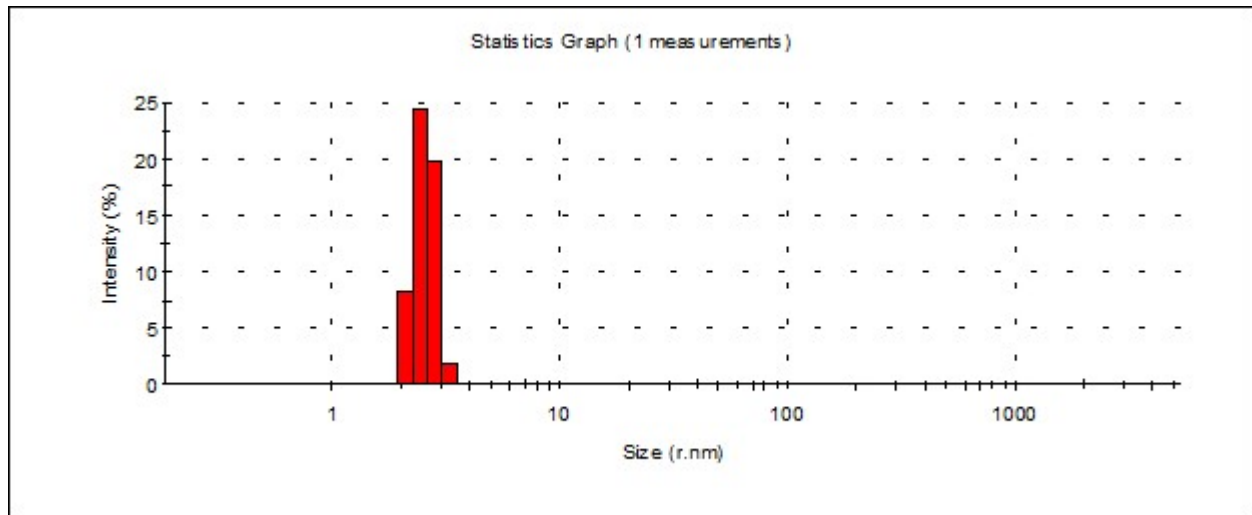

$$\alpha_{CPZ} = 0.6$$

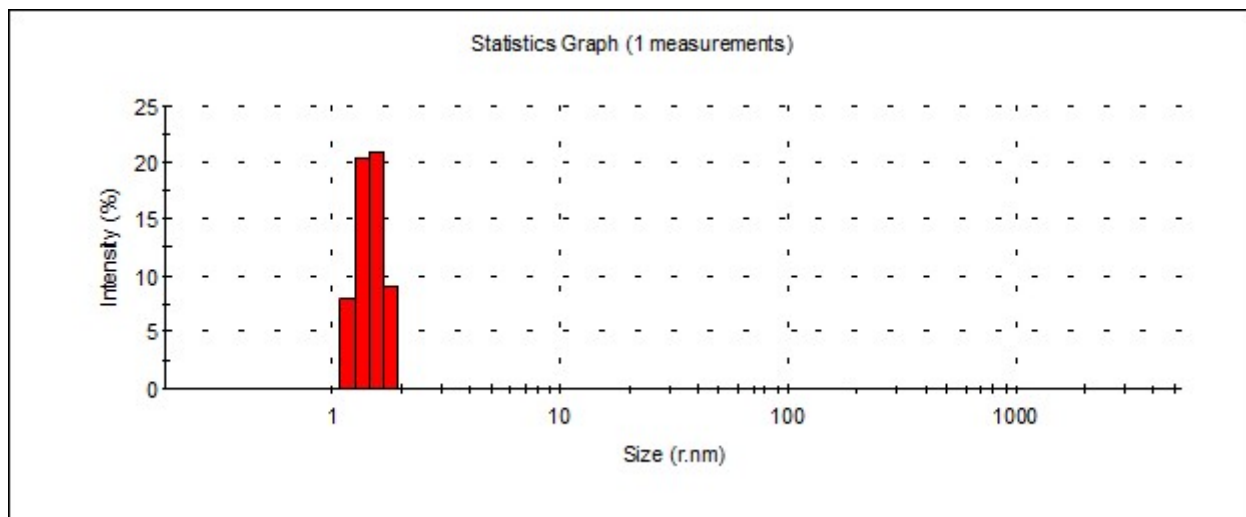

$$\alpha_{CPZ} = 0.8$$

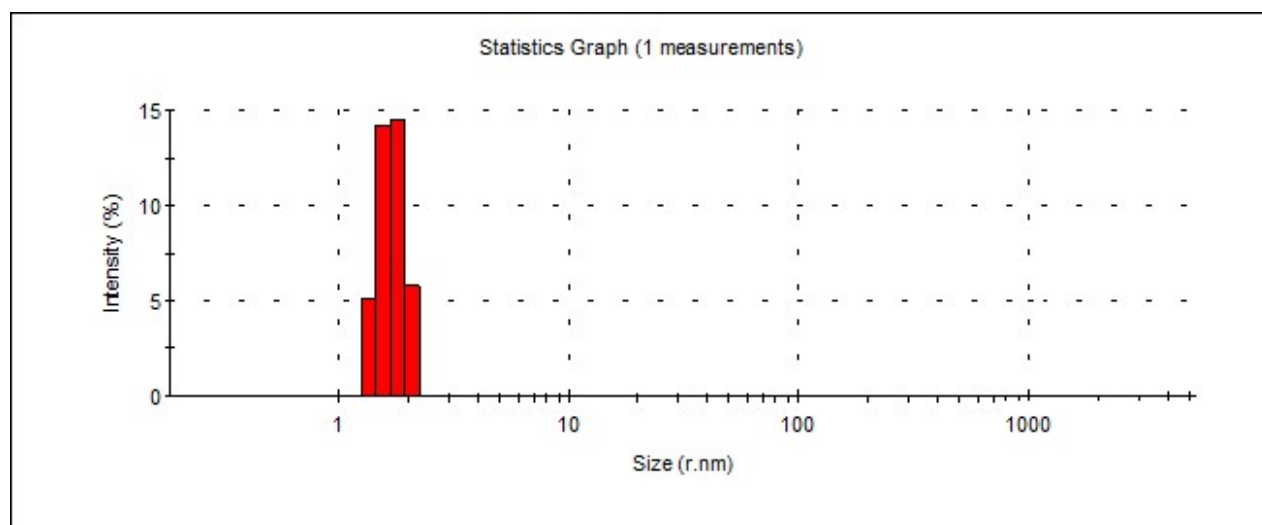

**Dynamic light scattering (DLS) size distribution plots of CPZ/C<sub>14</sub>Ab system**

$$\alpha_{CPZ} = 0$$



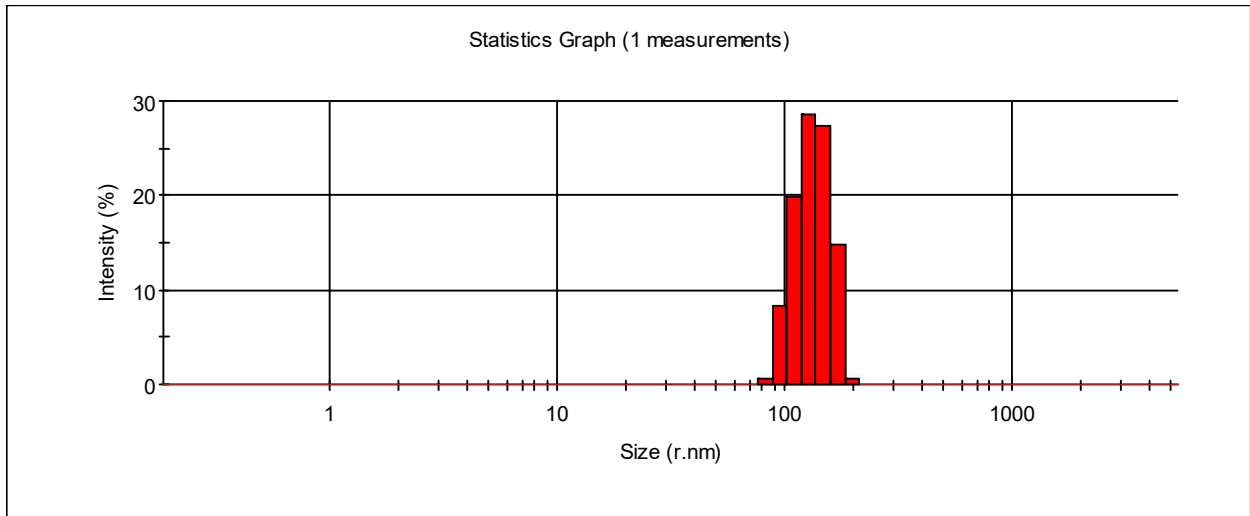

$$\alpha_{CPZ} = 0.1$$

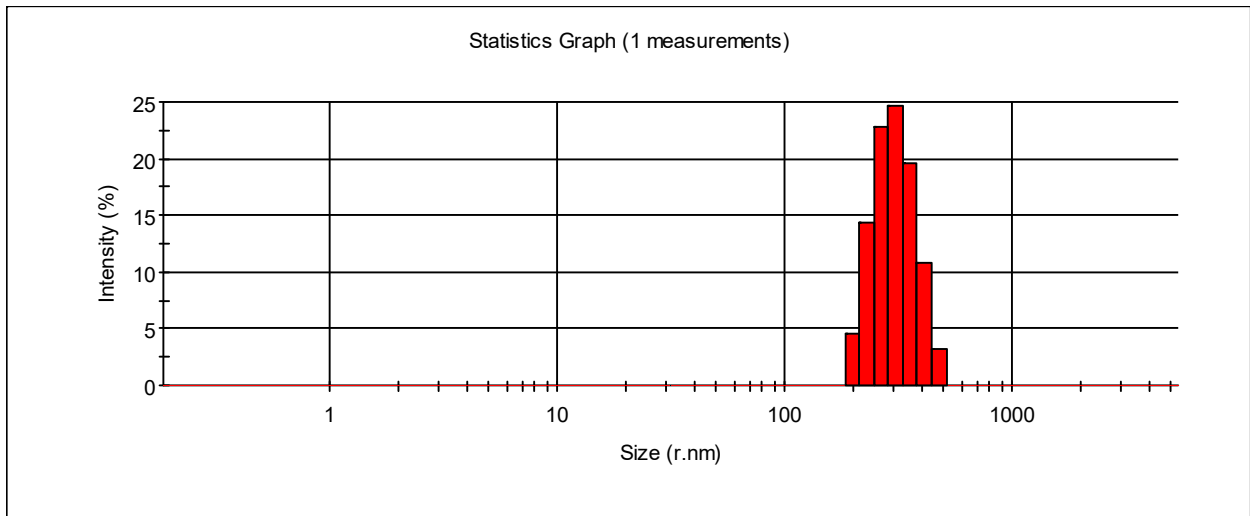

$$\alpha_{CPZ} = 0.2$$

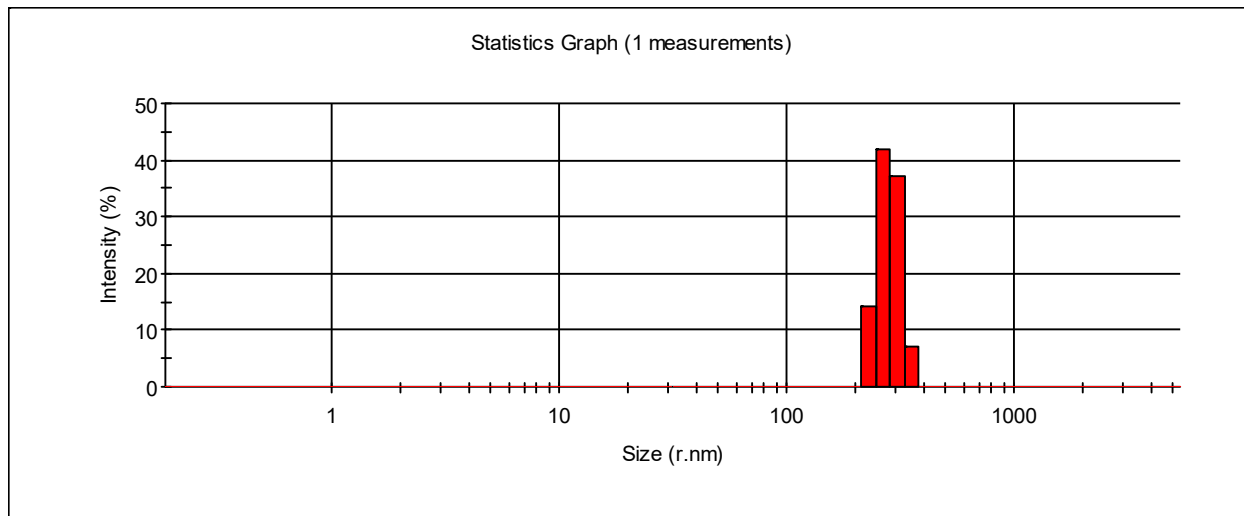

$$\alpha_{CPZ} = 0.4$$

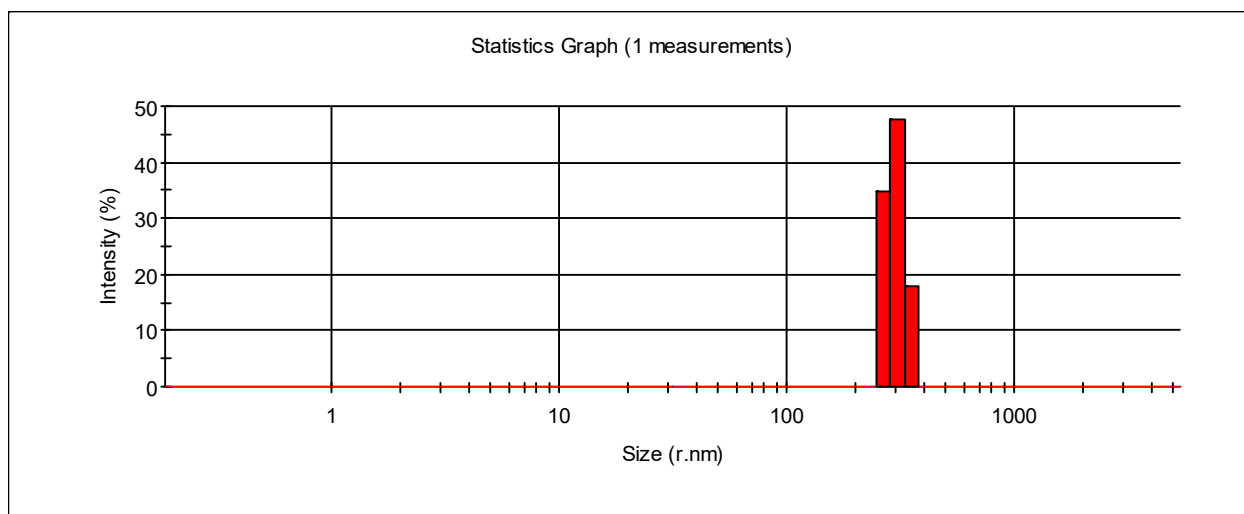

$$\alpha_{CPZ} = 0.5$$

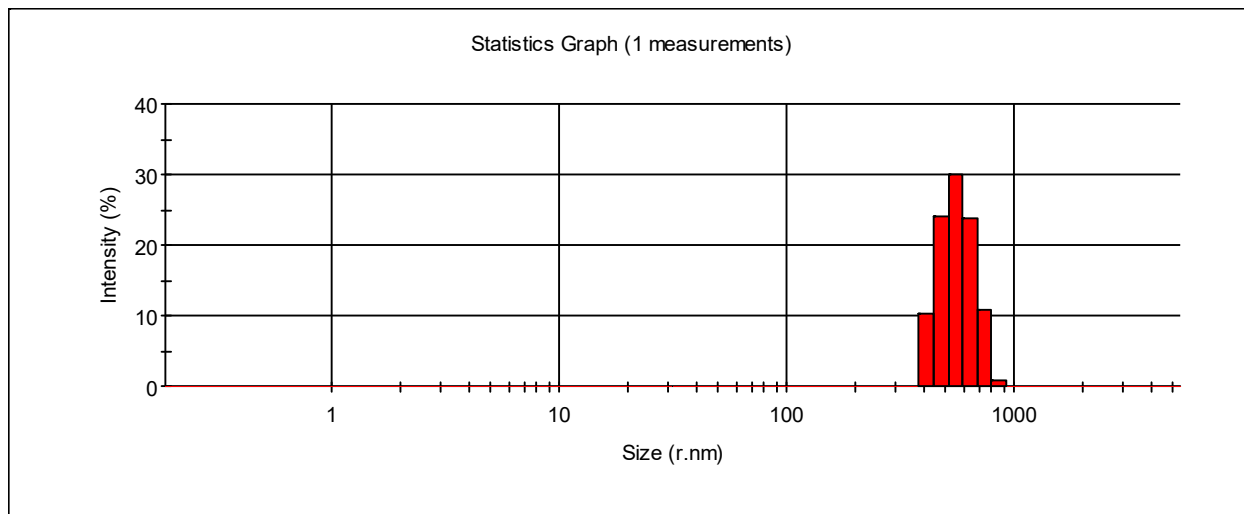

$$\alpha_{CPZ} = 0.6$$

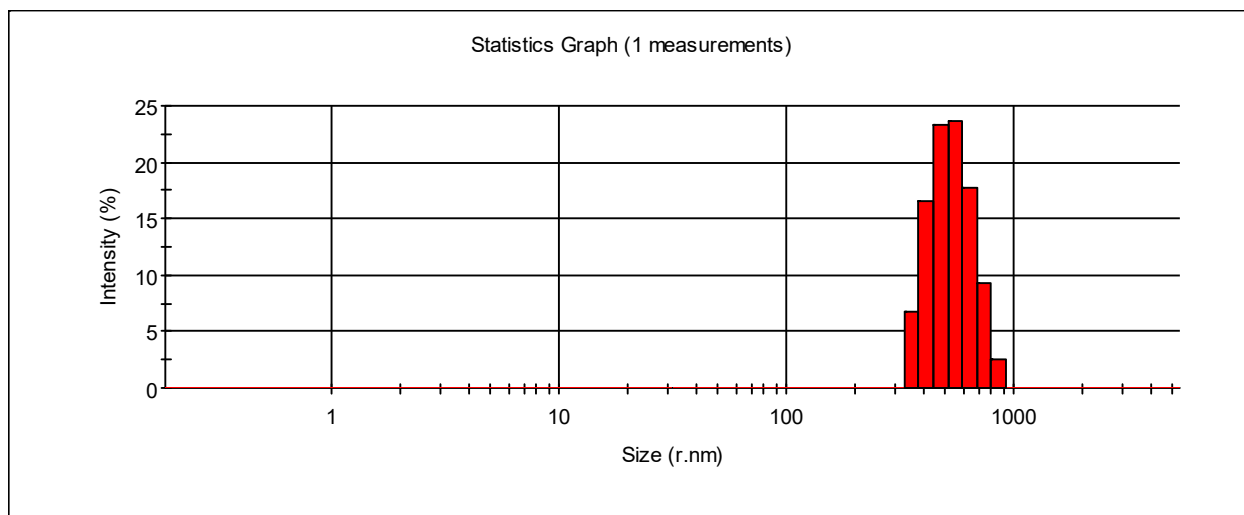

$$\alpha_{CPZ} = 0.8$$

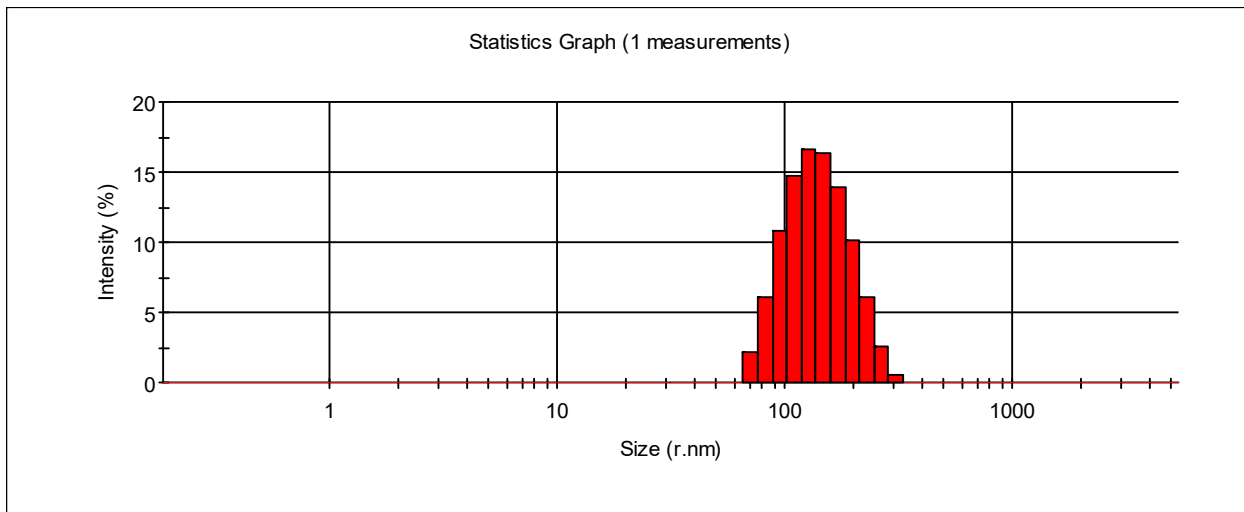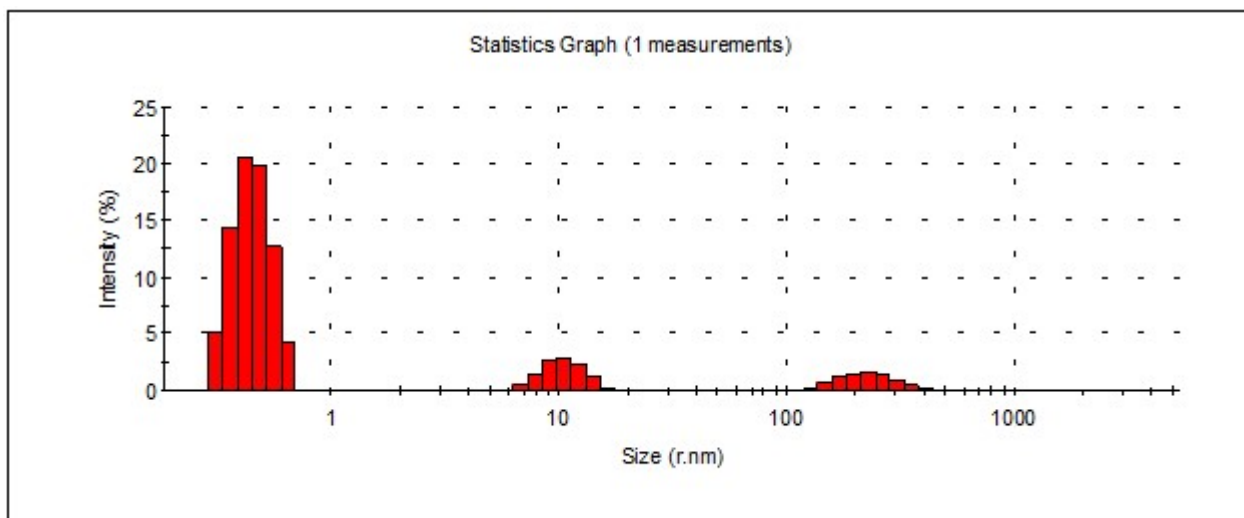

$\alpha_{CPZ} = 1.0$
